# Supplementary material
Source: PubMed Central journal article supplement (PMC3065723)
Supplement: Supp_Data.pdf [file Supp_Data.pdf]

## Supplementary Data

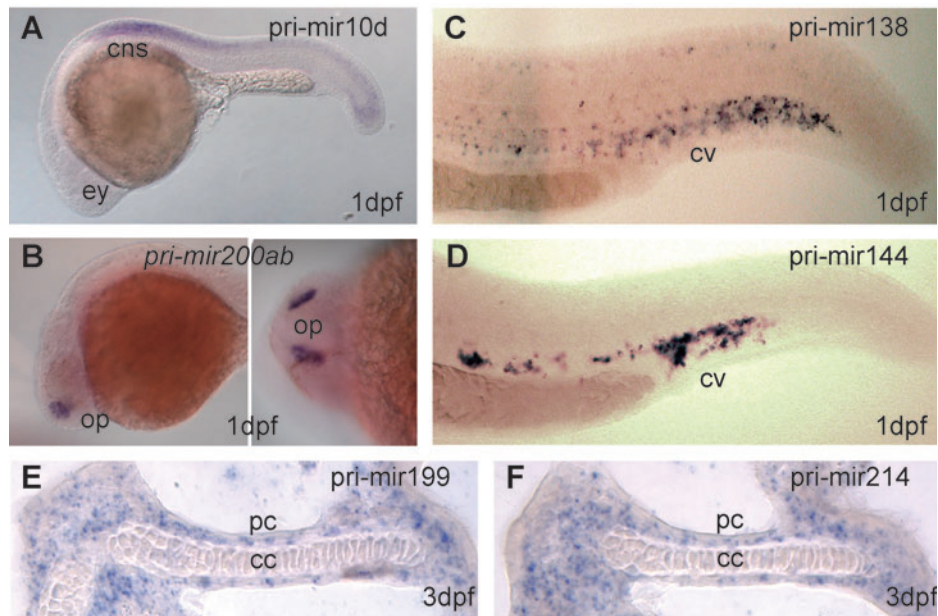

**SUPPLEMENTARY FIG. S1.** Riboprobe detection in whole mounts of 24 hour postfertilization embryos for primary transcripts of *mir-10d*, *mir-138*, *mir-144*, *mir-199*, *mir-200ab*, and *mir-214*. **(A–D)** PriMiSH for *miR-10d*, *mir-138*, *mir-144*, and *mir-200ab* in whole-mount embryos revealed specific expression of these pri-miRNAs in the central nervous system, caudal vein, and olfactory primordium, respectively. **(E, F)** PriMiSH of pri-miR-199 and pri-miR-214 on histological sections revealed expression in the mesenchyme surrounding the ceratohyal cartilage in the pharyngeal skeleton of 3 dpf embryos. cc, cartilage cell; cns, central nerve system; cv, caudal vein; dpf, day postfertilization; ey, eye; miRNA, microRNA; op, olfactory primordium; pc, perichondrium; PriMiSH, pri-miRNA *in situ* hybridization.
